# Supplementary material
Source: MDPI journal article supplement (https://www.mdpi.com/2073-4344/8/1/34)
Supplement: s1 [file s1]

Supplementary information

## Co-Detection of Dopamine and Glucose with High Temporal Resolution

Jenny Bergman <sup>1</sup>, Lisa Mellander <sup>2</sup> and Ann-Sofie Cans <sup>3,\*</sup>

<sup>1</sup> Department of Chemistry and Molecular Biology, Gothenburg University, 41296 Gothenburg, Sweden; jenny.bergman@chem.gu.se

<sup>2</sup> Department of Physiology, Institute of Neuroscience and Physiology, University of Gothenburg, Gothenburg, Sweden; lisa.mellander@gu.se

<sup>3</sup> Department of Chemistry and Chemical Engineering, Chalmers University of Technology, 412 96 Gothenburg Sweden

\* Correspondence: cans@chalmers.se; Tel.: +46-31-772-1000

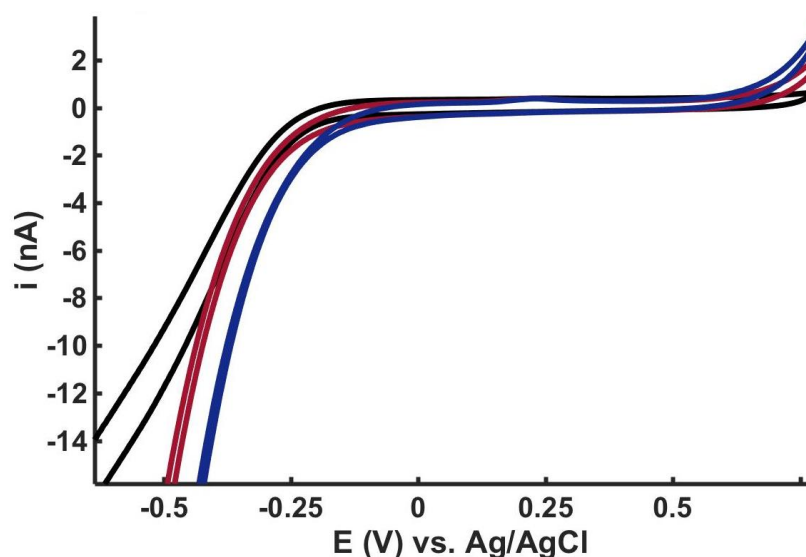

**Figure S.1** Cyclic voltammetry of a CFME-AuNP in PBS buffer (black) 5 mM H<sub>2</sub>O<sub>2</sub> (red) and 10 mM H<sub>2</sub>O<sub>2</sub>. The voltammogram shows that H<sub>2</sub>O<sub>2</sub> is reduced at potentials below -0.25 V and that no oxidation reaction occurs involving H<sub>2</sub>O<sub>2</sub> when potential +0.5 V is applied.

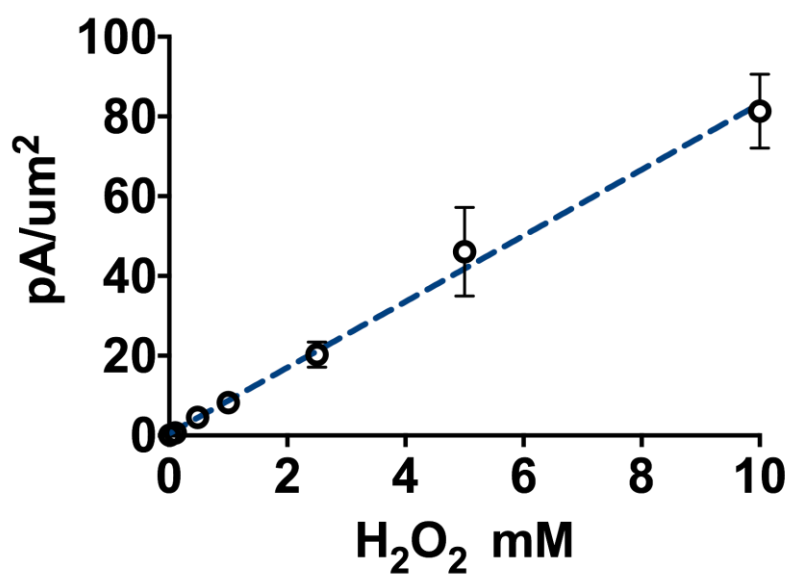

**Figure S.2** The AuNP-CFME response to H<sub>2</sub>O<sub>2</sub> shows linearity over a large concentration range (10  $\mu$ M – 10 mM) and display a sensitivity of  $8.4 \pm 0.5$  pA mM<sup>-1</sup> $\mu$ m. (R-square 0.996).

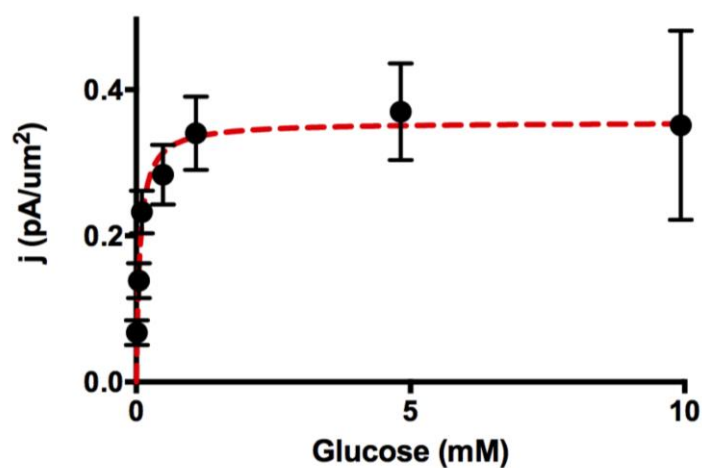

**Figure S.3** The GOx-AuNP-CFME response to glucose for the whole concentration range tested (10  $\mu$ M – 10 mM).
